# Supplementary material for: Apoptosis-associated Speck-like Protein (ASC) Controls Legionella pneumophila Infection in Human Monocytes
Source: PubMed Central journal article supplement — J Biol Chem. 2010 Nov 19;286(5):3203–8. doi: 10.1074/jbc.M110.197681 (PMC3030324; doi:10.1074/jbc.m110.197681), 2010-11-19
Supplement: supp_M110.197681_jbc.M110.197681-4.pdf [file supp_M110.197681_jbc.M110.197681-4.pdf]

## Supplementary Table 1

Human primers used in qRT-PCR

| Gene   | Size |        | Sequence                                           |
|--------|------|--------|----------------------------------------------------|
| CASP1  | 166  | F<br>R | GGAAACAAAAGTCGGCAGAG<br>ACGCTGTACCCCAGATTTTG       |
| CAP1   | 80   | F<br>R | ATTCCCTGGATTGTGAAATAGTC<br>ATTAAAGTCACCGCCTTCTGTAG |
| GAPDH  | 133  | F<br>R | ACTTTGGTACGTGGAAGGACT<br>GTAGAGGCAGGGATGATGTTCT    |
| PYCARD | 172  | F<br>R | GCACTTTATAGACCAGCACCG<br>GGCTGGTGTGAAACTGAAGA      |
| IL1B   | 151  | F<br>R | CCAGTGAAATGATGGCTTATTAC<br>CTGTAGTGGTGGTCGGAGATT   |
| NLRC4  | 149  | F<br>R | TGAACTGATCGACAGGATGAAC<br>GTCTCCAGTTTTTCAACCCAAG   |
