# Supplementary figures and images for: Apoptosis-associated Speck-like Protein (ASC) Controls Legionella pneumophila Infection in Human Monocytes
Source: PubMed Central journal article supplement — J Biol Chem. 2010 Nov 19;286(5):3203–8. doi: 10.1074/jbc.M110.197681 (PMC3030324; doi:10.1074/jbc.m110.197681), 2010-11-19

Supplementary figure 1

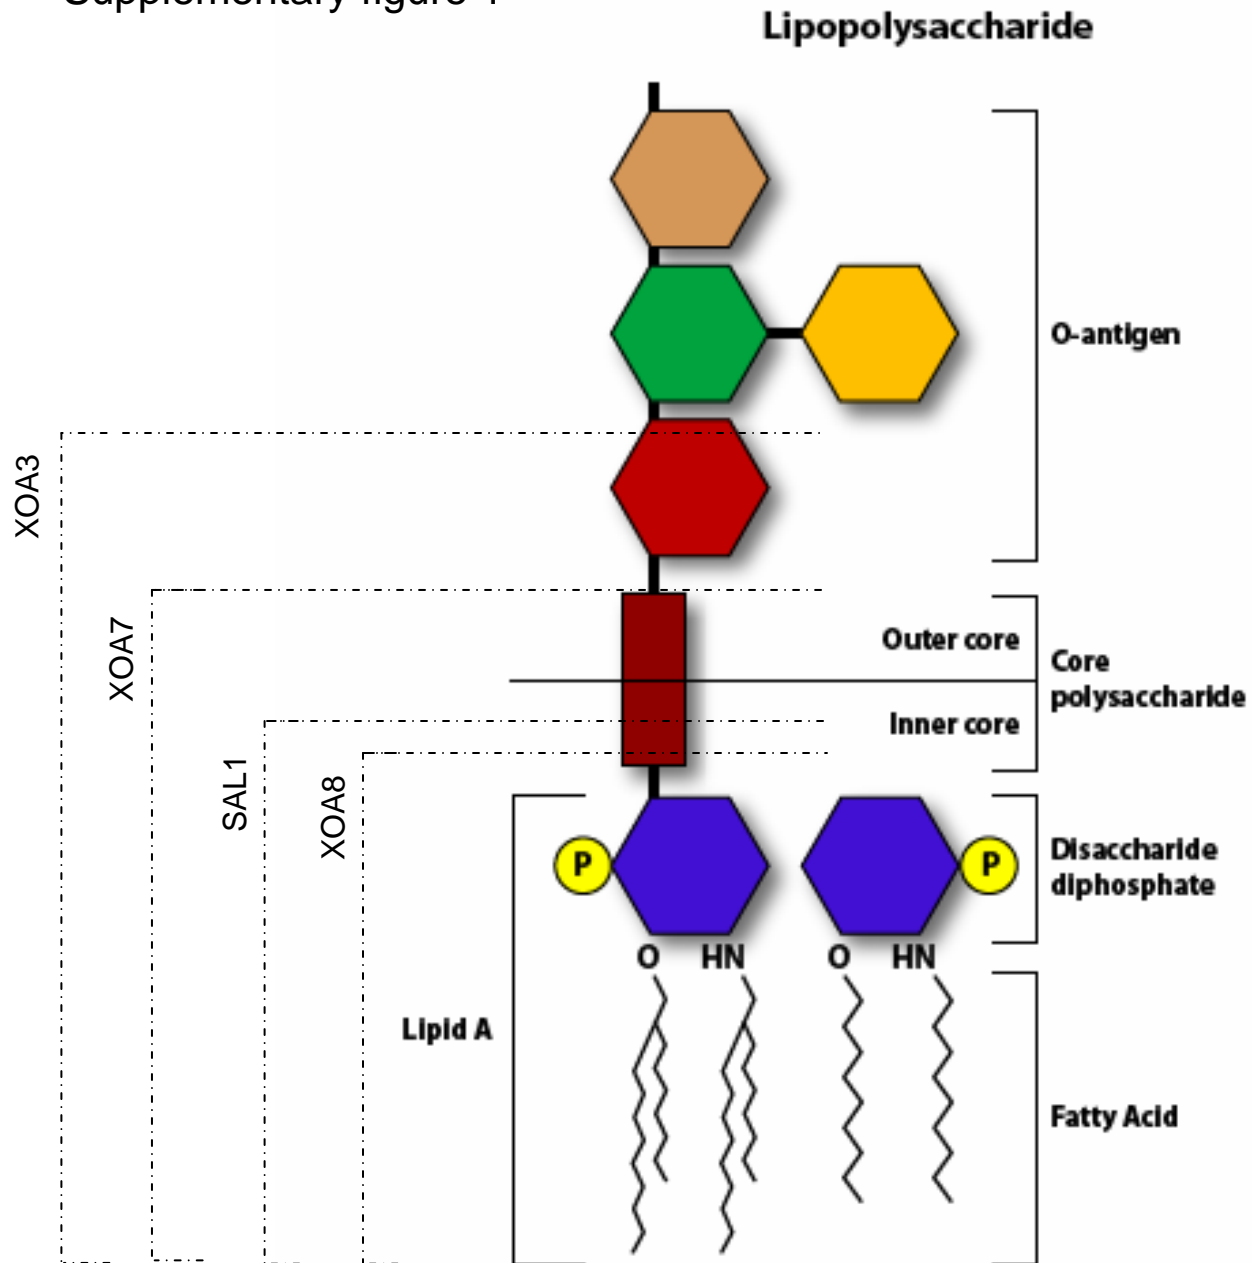

Supplement: supp_M110.197681_Suppl_figure_1.pdf [file supp_M110.197681_Suppl_figure_1.pdf]

## Supplementary Figure 2

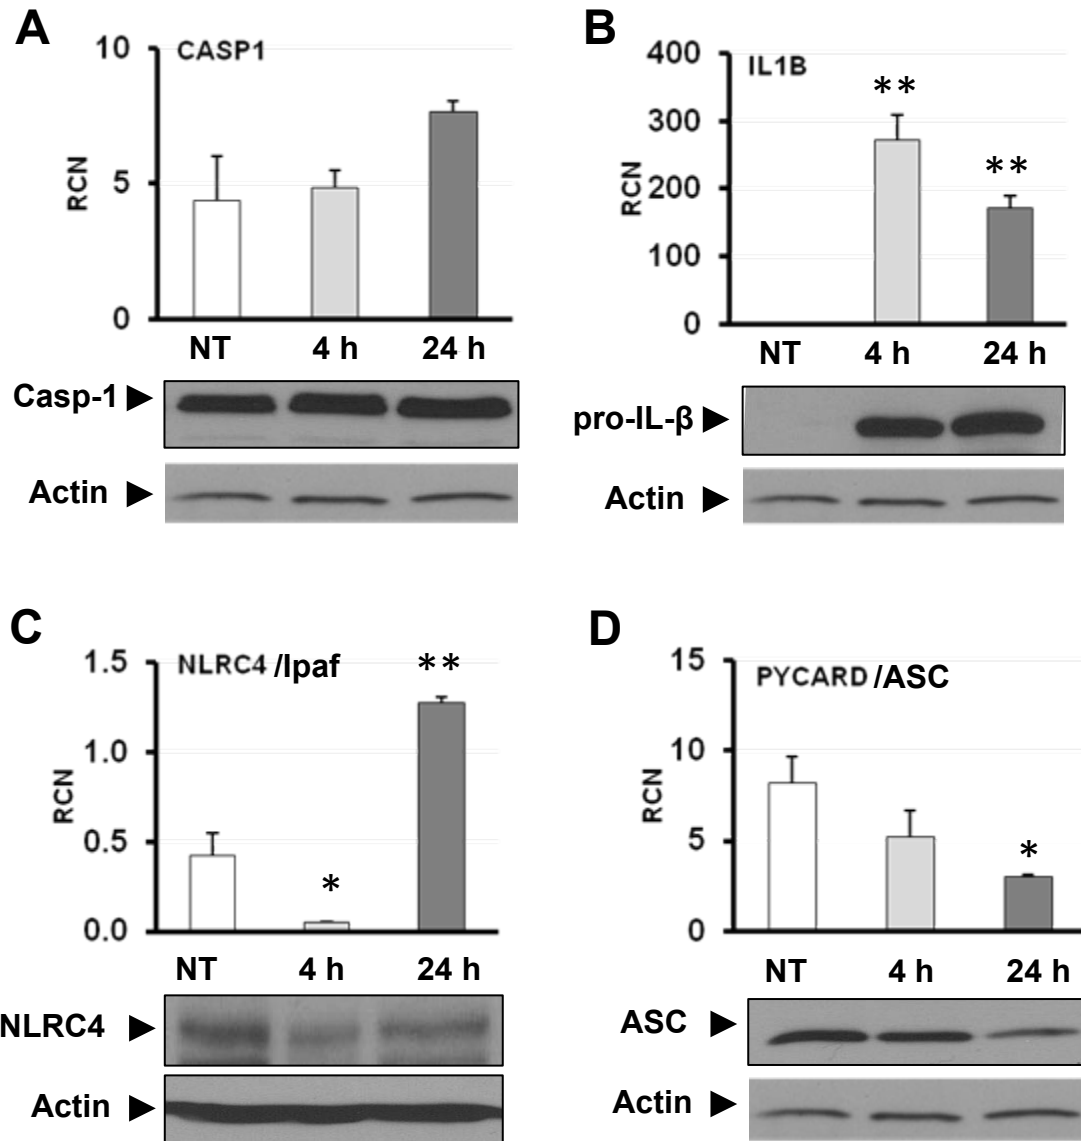

Supplement: supp_M110.197681_jbc.M110.197681-2.pdf [file supp_M110.197681_jbc.M110.197681-2.pdf]

### Supplementary Figure 3

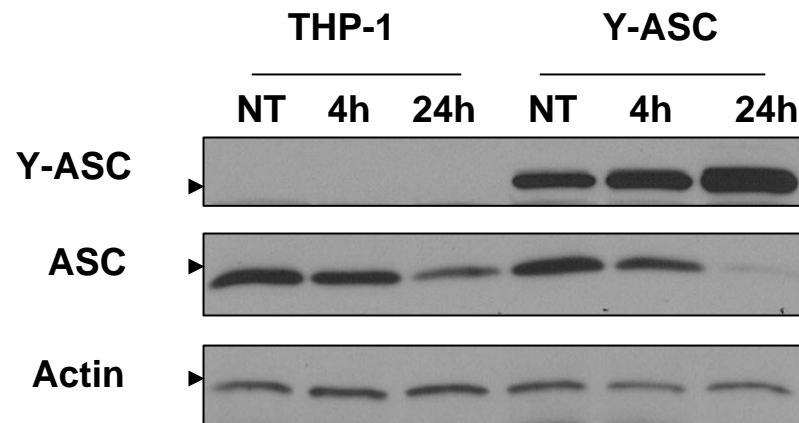

Supplement: supp_M110.197681_jbc.M110.197681-3.pdf [file supp_M110.197681_jbc.M110.197681-3.pdf]
